# Supplementary material for: Three-dimensional two-fold interpenetrated CrIII–GdIIIheterometallic framework as an attractive cryogenic magnetorefrigerant
Source: Royal Society of Chemistry journal article supplement (doi:10.1039/c5ce00997a), 2015-01-01
Supplement: c5ce00997a1.pdf [file c5ce00997a1.pdf]

## *Electronic Supplementary Information (ESI)*

### **Three-dimensional two-fold interpenetrated Cr<sup>III</sup>-Gd<sup>III</sup> heterometallic framework as an attractive cryogenic magnetorefrigerant**

**Sui-Jun Liu,\* Xin-Rong Xie, Teng-Fei Zheng, Jun Bao, Jin-Sheng Liao, Jing-Lin Chen, and He-Rui Wen\***

School of Metallurgical and Chemical Engineering, Jiangxi University of Science and Technology, Ganzhou 341000, P.R. China

---

\*Corresponding author. E-mail: liusuijun147@163.com, wenherui63@163.com. Tel: +86-797-8312553.

### **Contents**

**Table S1.** Comparison of  $-\Delta S_m^{\max}$  (larger than 30.0 J kg<sup>-1</sup> K<sup>-1</sup> with  $\Delta H = 7/9$  T) among **1** and 3d-Gd<sup>III</sup> complexes associated with potential molecule-based magnetic coolers.

**Table S2.** Selected bond lengths (Å) and angles (°) of **1**.

**Fig. S1.** Views of (a) the {Gd(ox)}<sub>∞</sub> chain in **1**; (b) the two interpenetrating 3D networks along *c* direction.

**Fig. S2.** The IR spectrum of **1**.

**Fig. S3.** The XRPD patterns of **1**.

**Fig. S4.** The TGA curve for **1**.

**Fig. S5.** The ZFC/FC curves under 50 Oe field of **1**.

**Table S1** Comparison of  $-\Delta S_m^{\max}$  (larger than  $30.0 \text{ J kg}^{-1} \text{ K}^{-1}$  with  $\Delta H = 7/9 \text{ T}$ ) among **1** and  $3d\text{-Gd}^{\text{III}}$  complexes associated with potential molecule-based magnetic coolers.

| Complex                                                                                                      | Dimensionality | $-\Delta S_m^{\max} [\text{J kg}^{-1} \text{ K}^{-1}]$<br>( $\Delta H$ ) | $-\Delta S_m^{\max}$<br>[ $\text{mJ cm}^{-3} \text{ K}^{-1}$ ] |
|--------------------------------------------------------------------------------------------------------------|----------------|--------------------------------------------------------------------------|----------------------------------------------------------------|
| $\{[\text{Mn}(\text{H}_2\text{O})_6][\text{MnGd}(\text{oda})_3]_2 \cdot 6\text{H}_2\text{O}\}_n^{\text{S2}}$ | 3D             | 50.1 (7 T)                                                               | 114.28                                                         |
| $[\text{Co}_{10}\text{Gd}_{42}]^{\text{S3}}$                                                                 | 0D             | 41.26 (7 T)                                                              | 112.64                                                         |
| $\{[\text{CrGd}(\text{IDA})_2(\text{C}_2\text{O}_4)]\}_\infty$ ( <b>1</b> )                                  | 3D             | 39.86 (7 T)                                                              | 93.69                                                          |
| $[\text{Cr}_2\text{Gd}_3]^{\text{S4}}$                                                                       | 0D             | 38.3 (7 T)                                                               | 57.79                                                          |
| $[\text{Ni}_{10}\text{Gd}_{42}]^{\text{S3}}$                                                                 | 0D             | 38.2 (7 T)                                                               | 105.47                                                         |
| $[\text{Gd}_3\text{Mn}_2]_\infty^{\text{S5}}$                                                                | 3D             | 40.3 (7 T)                                                               | 92.32                                                          |
| $[\text{Ni}_{12}\text{Gd}_{36}]^{\text{S6}}$                                                                 | 0D             | 36.3 (7 T)                                                               | 83.49                                                          |
| $[\text{Cu}_3\text{Gd}_6]_\infty^{\text{S7}}$                                                                | 3D             | 35.76 (7 T)                                                              | --                                                             |
| $[\text{Cu}_2\text{Gd}_7]^{\text{S8}}$                                                                       | 0D             | 34.6 (9 T)                                                               | 63.70                                                          |
| $[\text{Ni}_2\text{Gd}_2(\text{hmp})_4(\text{OAc})_6]^{\text{S9}}$                                           | 0D             | 34.4 (7 T)                                                               | 65.57                                                          |
| $[\text{Mn}_4\text{Gd}_6\text{P}_6]^{\text{S10}}$                                                            | 0D             | 33.7 (7 T)                                                               | 54.12                                                          |
| $[\text{Fe}_2\text{Gd}_3]^{\text{S4}}$                                                                       | 0D             | 33.1 (7 T)                                                               | 50.71                                                          |
| $[\text{Cu}_4\text{Gd}_{12}]^{\text{S8}}$                                                                    | 0D             | 33.0 (9 T)                                                               | 62.90                                                          |
| $[\text{Co}_4\text{Gd}_{10}]^{\text{S9}}$                                                                    | 0D             | 32.6 (7 T)                                                               | 54.31                                                          |
| $[\text{Cu}_5\text{Gd}_4]^{\text{S12}}$                                                                      | 0D             | 31 (9 T)                                                                 | 61.66                                                          |
| $[\text{ZnGd}_5]_\infty^{\text{S13}}$                                                                        | 3D             | 30.7 (7 T)                                                               | 57.96                                                          |

$-\Delta S_m^{\max} [\text{mJ cm}^{-3} \text{ K}^{-1}] = -\Delta S_m^{\max} [\text{J kg}^{-1} \text{ K}^{-1}] * \rho_{\text{cald}} [\text{g cm}^{-3}]$ . odaH = oxydiacetate acid, H<sub>2</sub>IDA = iminodiacetate acid, hmpH = 2-(hydroxymethyl)pyridine

## References

- S1. G. M. Sheldrick, *SHELXL97, Program for Crystal Structure Refinement*, University of Göttingen: Göttingen, Germany, 1997.
- S2. F.-S. Guo, Y.-C.Chen, J.-L. Liu, J.-D. Leng, Z.-S. Meng, P. Vrabel, M. Orendáč and M.-L.Tong, *Chem. Commun.*, 2012, **48**, 12219.
- S3. J.-B. Peng, Q.-C. Zhang, X.-J. Kong, Y.-Z. Zheng, Y.-P. Ren, L.-S. Long, R.-B. Huang, L.-S. Zheng and Z. Zheng, *J. Am. Chem. Soc.*, 2012, **134**, 3314.

- S4. K. S. Pedersen, G. Lorusso, J. J. Morales, T. Weyhermüller, S. Piligkos, S. K. Singh, D. Larsen, M. Schau-Magnussen, G. Rajaraman, M. Evangelisti and J. Bendix, *Angew. Chem., Int. Ed.*, 2014, **53**, 2394.
- S5. H.-C. Hu, X.-M. Kang, C.-S. Cao, P. Cheng and B. Zhao, *Chem. Commun.*, 2015, **51**, 10850.
- S6. J.-B. Peng, Q.-C. Zhang, X.-J. Kong, Y.-P. Ren, L.-S. Long, R.-B. Huang, L.-S. Zheng and Z. Zheng, *Angew. Chem., Int. Ed.*, 2011, **50**, 10649.
- S7. Y. Bing, N. Xu, W. Shi, K. Liu and P. Cheng, *Chem. Asian J.*, 2013, **8**, 1412.
- S8. S. K. Langley, B. Moubaraki, C. Tomasi, M. Evangelisti, E. K. Brechin and K. S. Murray, *Inorg. Chem.*, 2014, **53**, 13154.
- S9. P. Wang, S. Shannigrahi, N. L. Yakovlev and T. S. A. Hor, *Chem. Asian J.*, 2013, **8**, 2943.
- S10. Y.-Z. Zheng, E. M. Pineda, M. Helliwell and R. E. P. Winpenny, *Chem.–Eur. J.*, 2012, **18**, 4161.
- S11. E. M. Pineda, F. Tuna, R. G. Pritchard, A. C. Regan, R. E. P. Winpenny and E. J. L. McInnes, *Chem. Commun.*, 2013, **49**, 3522.
- S12. S. K. Langley, N. F. Chilton, B. Moubaraki, T. Hooper, E. K. Brechin, M. Evangelisti and K. S. Murray, *Chem. Sci.*, 2011, **2**, 1166.
- S13. P.-F. Shi, Y.-Z. Zheng, X.-Q. Zhao, G. Xiong, B. Zhao, F.-F. Wan and P. Cheng, *Chem.–Eur. J.*, 2012, **18**, 15086.

**Table S2.** Selected bond lengths (Å) and angles (°) for **1**<sup>a</sup>

|                                        |            |                                        |           |
|----------------------------------------|------------|----------------------------------------|-----------|
| N1—Cr1                                 | 2.054 (8)  | O2—Gd1                                 | 2.364 (4) |
| O1—Cr1                                 | 1.985 (4)  | O4—Gd1                                 | 2.415 (4) |
| O1 <sup>#3</sup> —Cr1—O1               | 88.0(3)    | O1—Cr1—N1                              | 82.7(2)   |
| O1 <sup>#4</sup> —Cr1—O1               | 92.0(3)    | O1 <sup>#5</sup> —Cr1—N1               | 97.3(2)   |
| O1—Cr1—N1 <sup>#5</sup>                | 97.3(2)    | O2 <sup>#6</sup> —Gd1—O2 <sup>#7</sup> | 99.0(3)   |
| O4 <sup>#7</sup> —Gd1—O4 <sup>#6</sup> | 132.4(2)   | O2 <sup>#6</sup> —Gd1—O2               | 149.6(2)  |
| O4—Gd1—O4 <sup>#6</sup>                | 67.31(19)  | O2 <sup>#7</sup> —Gd1—O2               | 88.9(3)   |
| O2—Gd1—O4 <sup>#6</sup>                | 138.73(14) | O2—Gd1—O4 <sup>#7</sup>                | 76.86(17) |
| O2 <sup>#7</sup> —Gd1—O4 <sup>#6</sup> | 77.90(16)  | O2—Gd1—O4                              | 71.66(14) |
| O4 <sup>#7</sup> —Gd1—O4               | 135.4(2)   |                                        |           |

<sup>a</sup>Symmetry codes: #3:  $-x+2, -y+1, z$ ; #4:  $-y+3/2, -x+3/2, -z+1/2$ ; #5:  $-x+2, -y, z$ ; #6:  $-x+2, -y, -z+1$ ; #7:  $-y+3/2, -x+3/2, -z+1/2$ .

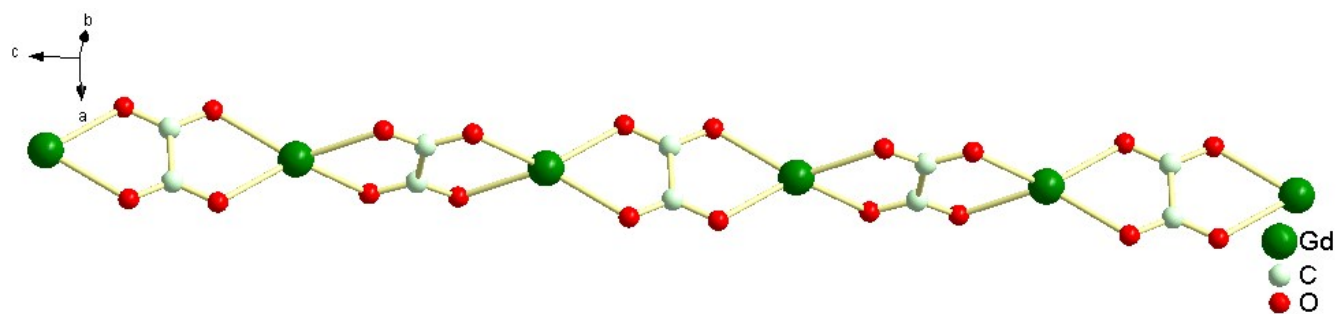

(a)

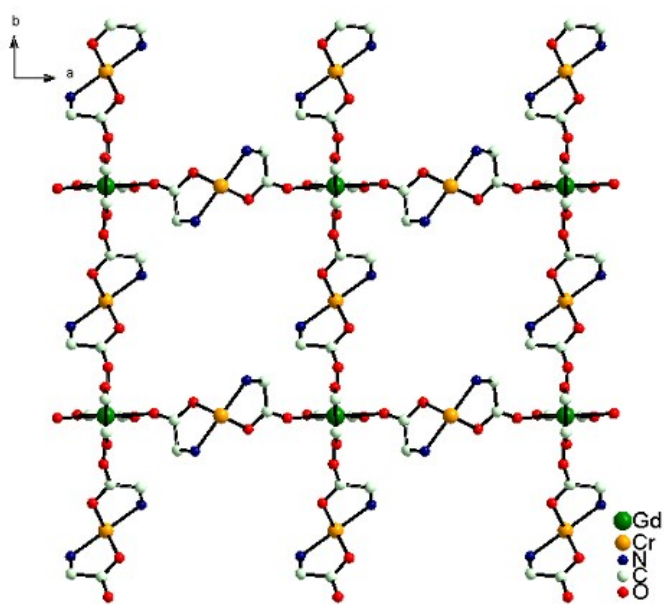

(b)

**Fig. S1.** Views of (a) the  $\{\text{Gd}(\text{ox})\}_\infty$  chain in **1**; (b) the two interpenetrating 3D networks along  $c$  direction.

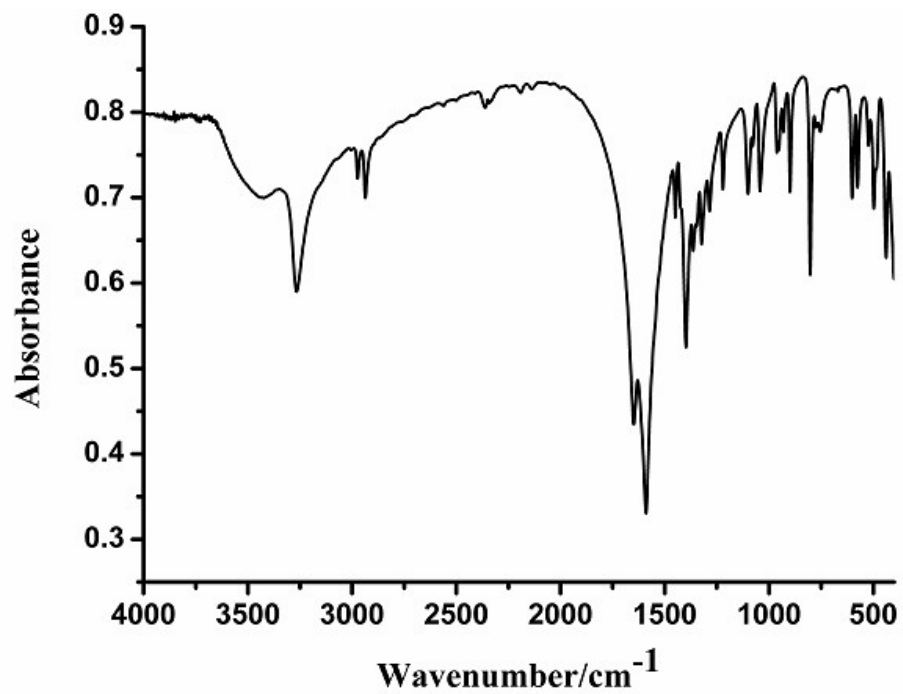

Fig. S2. The IR spectrum of 1.

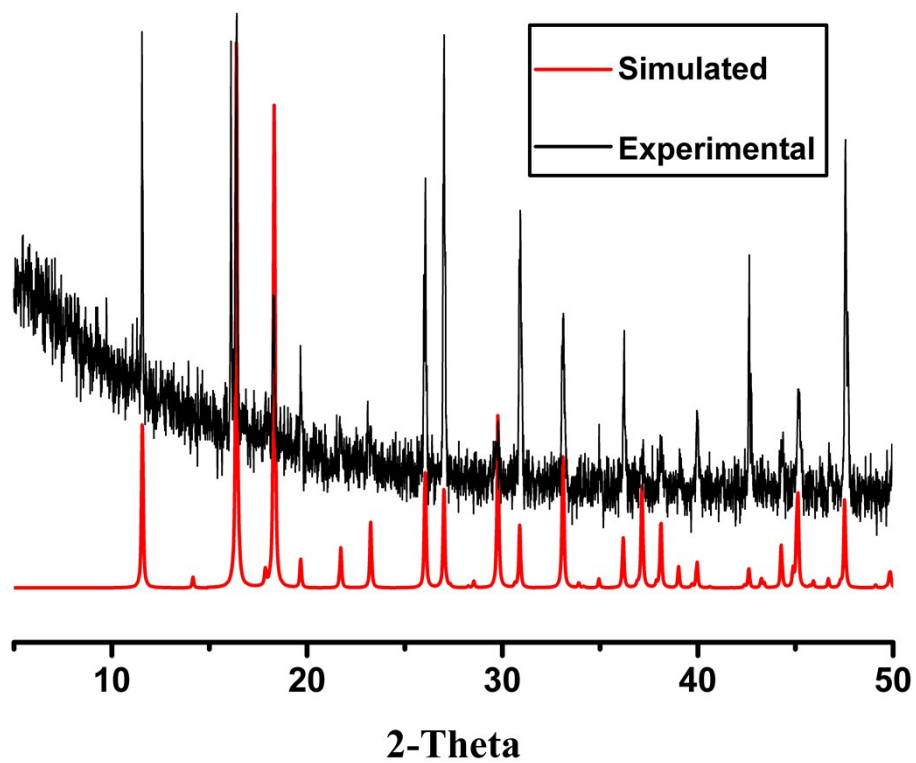

Fig. S3. The XRPD patterns of 1.

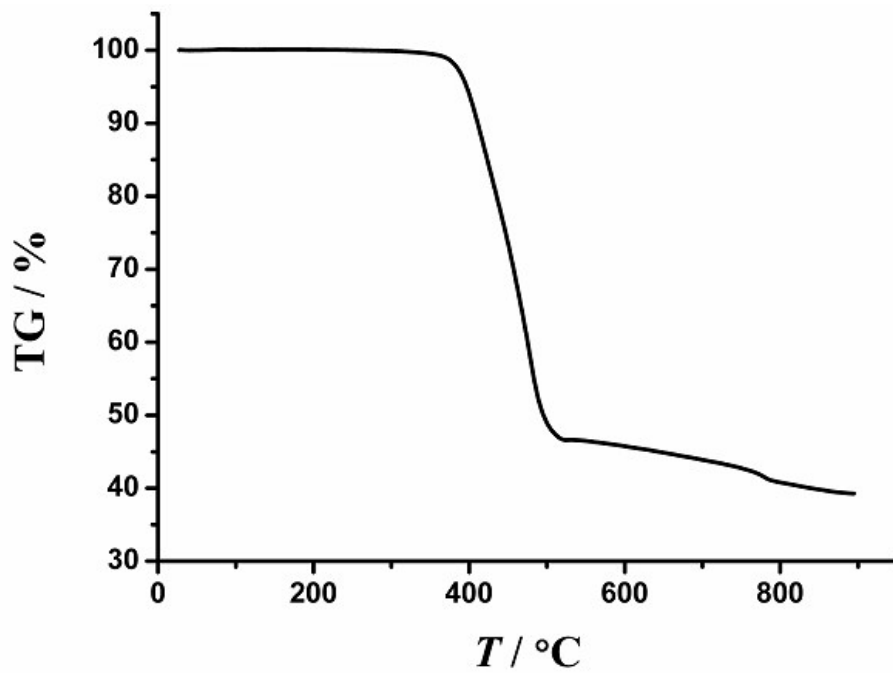

Fig. S4. The TGA curve for 1.

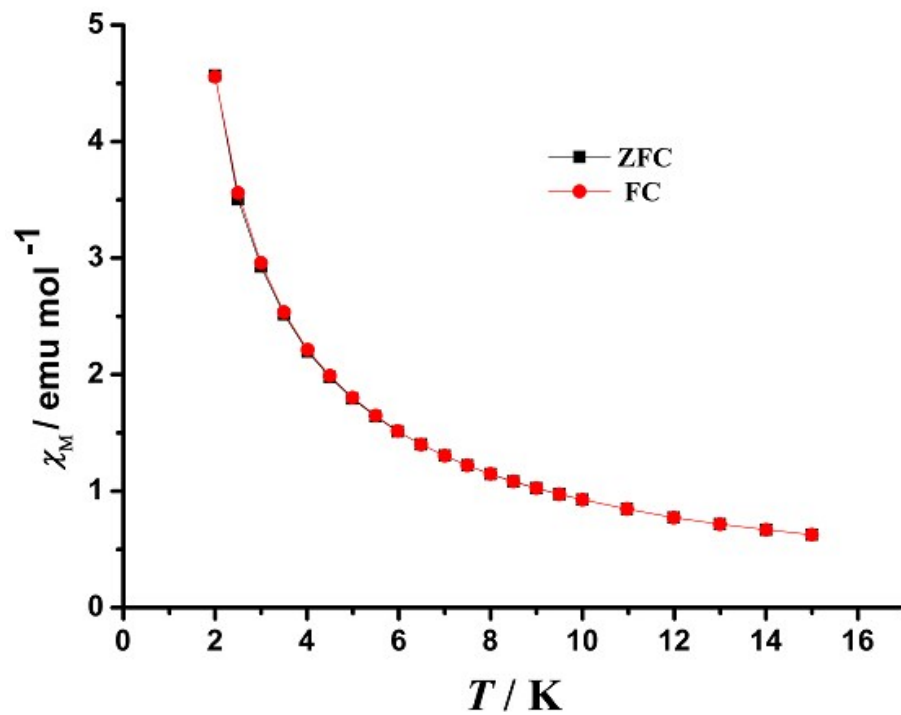

Fig. S5. The ZFC/FC curves under 50 Oe field of 1.
